# Supplementary material
Source: Royal Society of Chemistry journal article supplement (doi:10.1039/d6fb00081a)
Supplement: d6fb00081a1.pdf [file d6fb00081a1.pdf]

Table S1: Specifications of the used plasma device and seed type

| Plasma Reactor Characteristics and Treated Samples |                                                                                                                                                     |
|----------------------------------------------------|-----------------------------------------------------------------------------------------------------------------------------------------------------|
| Discharge configuration                            | Volume DBD in parallel plane geometry, symmetric electrodes                                                                                         |
| Electrode materials                                | Alumina dielectric plates $\varnothing = 25.4$ mm, $d = 0.5$ mm<br>Embedded silver powered/grounded electrodes $\varnothing = 21$ mm, $d = 0.05$ mm |
| Discharge gap                                      | 5 mm                                                                                                                                                |
| Discharge power                                    | Periodic AC (5 kHz) bursts at 500 Hz repetition frequency,<br>HV amplitude 21 kV (peak-to-peak)                                                     |
| Working gas                                        | Synthetic air (5.0), 1 slm at 20 °C and 760 Torr                                                                                                    |
| Treated samples                                    | Spring barley ( <i>Hordeum vulgare</i> L., cv. Malz, country of origin: Czech Republic),<br>3 seeds freely placed on the grounded side              |
| Sample preparation                                 | No soaking or sterilization (base moist content 11.5%)                                                                                              |
| Treatment approach                                 | Direct (filamentary micro-discharges directly impacting seeds)                                                                                      |
| Treatment time                                     | $t_{tr} = 0, 5, 10, 20, 40, 180,$ and 300 s seconds at a discharge duty cycle of 0.4                                                                |
| Discharge and Treatment Characteristics            |                                                                                                                                                     |
| Average discharge power                            | $1.2 \pm 0.1$ W                                                                                                                                     |
| Exposure energy per seed                           | Min: 2 ( $t_{tr} = 5$ s), max: 120 ( $t_{tr} = 300$ s) [J/seed]                                                                                     |
| Exposure energy per surface                        | Min: 0.025 ( $t_{tr} = 5$ s), max: 1.5 ( $t_{tr} = 300$ s) [J/mm <sup>2</sup> ]                                                                     |
| Exposure to temperature                            | $356 \pm 5$ K (time-averaged rotational temperature of N <sub>2</sub> (C <sup>3</sup> Π <sub>u</sub> ) state)                                       |
| Exposure to UV                                     | ≤1%* (UV-C); 19% (UV-B); 80% (UV-A)                                                                                                                 |
| Post-treatment testing                             |                                                                                                                                                     |
| Contact angle                                      | ≈120° (no treatment), ≈55° ( $t_{tr} \geq 10$ s),<br>(droplet of distilled water right after treatment)                                             |
| Imbibition                                         | 14 kernels in glass beakers (14 mL of DI water),<br>weight measured every 15 minutes                                                                |
| Germinability                                      | <48 kernels in Petri dishes (2 layers of filter paper + 20 ml DI water) – 4 repetitions<br>Incubation in the dark at 20°C for 3 days                |
| Root system growth                                 | 10 kernels in Petri dishes (2 layers of filter paper + 20 ml DI water) – 4 repetitions<br>Incubation in the dark at 20°C for 3 days                 |

\*UV-C detection is limited to approximately 225 nm by the photocathode of the ICCD and the efficiency of the dispersion grating used to detect spectra.

Table S2: Reference values of surface energy components of used liquids<sup>72</sup>.

| Liquid           | $\gamma^d_L$ (mJ/m <sup>2</sup> ) | $\gamma^p_L$ (mJ/m <sup>2</sup> ) | $\gamma^t_L$ (mJ/m <sup>2</sup> ) |
|------------------|-----------------------------------|-----------------------------------|-----------------------------------|
| Deionized water  | 21.8                              | 51.0                              | 72.8                              |
| Methylene iodide | 50.8                              | ≈0                                | 50.8                              |

Note:  $\gamma^d_L$ , dispersive component of surface energy;  $\gamma^p_L$ , polar component of surface energy;  $\gamma^t_L$ , total surface energy of liquid.

Table S3: Elemental composition determined from high-resolution XPS peaks for all tested treatment times of barley seeds. Graphical representation is in Figure 9.

| Treatment time, s | Atomic concentration of chemical elements, at.% |            |           |            |           |           |
|-------------------|-------------------------------------------------|------------|-----------|------------|-----------|-----------|
|                   | O                                               | C          | N         | Si         | K         | Ca        |
| 0                 | 9.2 ± 1.4                                       | 88.8 ± 1.7 | 0.9 ± 0.1 | 0.4 ± 0.2  | 0.3 ± 0.1 | 0.4 ± 0.2 |
| 10                | 21.8 ± 2.0                                      | 74.4 ± 3.2 | 1.1 ± 0.2 | 0.8 ± 0.6  | 1.6 ± 0.4 | 0.3 ± 0.3 |
| 40                | 35.1 ± 0.6                                      | 53.7 ± 0.7 | 1.5 ± 0.8 | 7.0 ± 2.8  | 2.2 ± 0.9 | 0.5 ± 0.1 |
| 180               | 52.4 ± 3.8                                      | 25.5 ± 7.6 | 2.4 ± 0.1 | 15.1 ± 4.4 | 3.9 ± 0.5 | 0.7 ± 0.5 |
| 300               | 57.9 ± 1.9                                      | 16.6 ± 1.8 | 2.4 ± 1.4 | 18.7 ± 3.3 | 3.5 ± 2.0 | 0.9 ± 0.9 |

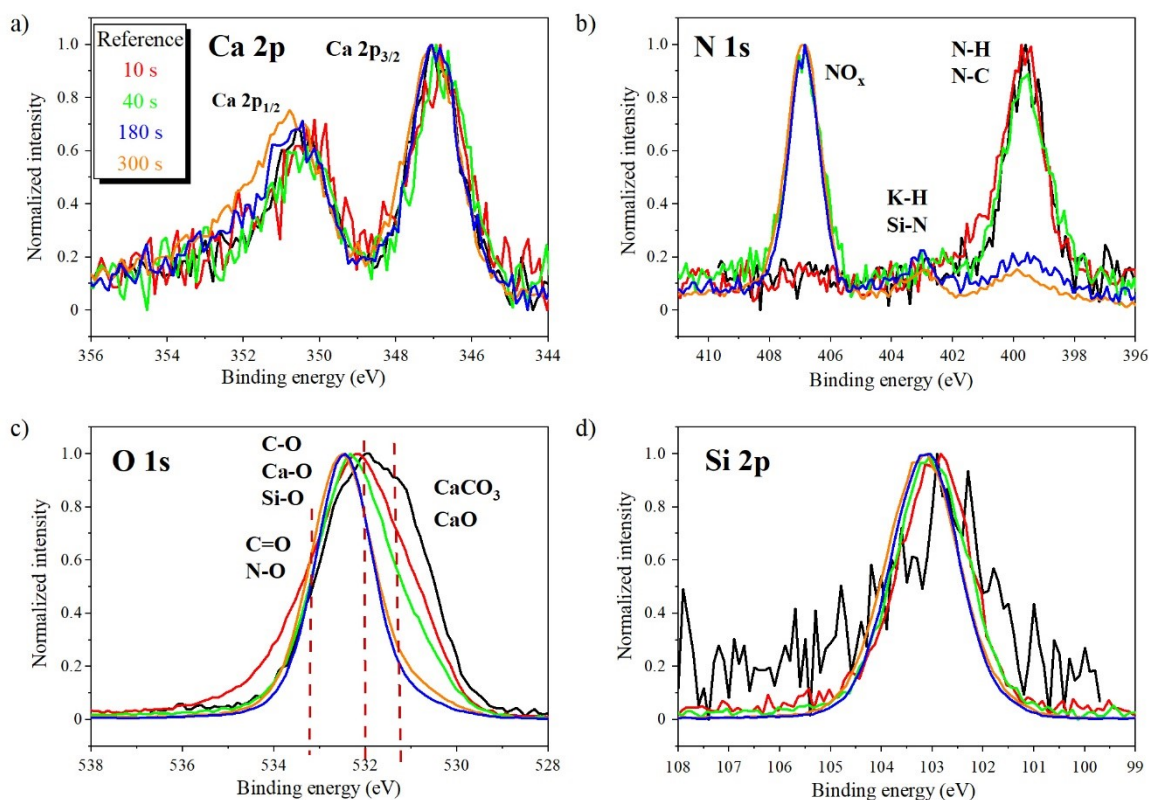

Figure S1: The effect of plasma treatment (0-300 s) on of Ca 2p, N 1s, O 1s, and Si 2p high-resolution XPS peaks of barley seeds.

Table S4: Evaluated parameters of seedling in biotesting. Data are presented as the average values ( $\pm$  standard errors), and the significance of the differences in average values between untreated seeds (reference) and treated seeds was evaluated by means of one-way analysis of variance (ANOVA) and Tukey's test. A P-value of less than 0.05 was considered statistically significant.

| Treatment time [s] | Parameters          |                     |                     |                       |                   |                            |                     |                     |
|--------------------|---------------------|---------------------|---------------------|-----------------------|-------------------|----------------------------|---------------------|---------------------|
|                    | Germination [%]     |                     |                     | Germination speed [%] | Germination index | Average root length [1 cm] |                     |                     |
|                    | 1 <sup>st</sup> day | 2 <sup>nd</sup> day | 3 <sup>rd</sup> day |                       |                   | 1 <sup>st</sup> day        | 2 <sup>nd</sup> day | 3 <sup>rd</sup> day |
| Reference          | 76 $\pm$ 4.32 a     | 83 $\pm$ 3.79 a     | 83 $\pm$ 3.79 a     | 91.49 $\pm$ 2.29 a    | 6.05 $\pm$ 0.30 a | 0.15 $\pm$ 0.01 a          | 3.52 $\pm$ 0.34 a   | 11.78 $\pm$ 1.20 a  |
| 10                 | 76 $\pm$ 2.31 a     | 79 $\pm$ 3 a        | 82 $\pm$ 2.58 a     | 92.72 $\pm$ 1.33 a    | 5.95 $\pm$ 0.19 a | 0.15 $\pm$ 0.01 a          | 4.14 $\pm$ 0.16 a   | 10.44 $\pm$ 0.56 a  |
| 40                 | 78 $\pm$ 3.46 a     | 80 $\pm$ 1.63 a     | 81 $\pm$ 1 a        | 96.25 $\pm$ 3.75 a    | 6.04 $\pm$ 0.19 a | 0.04 $\pm$ 0.02 b          | 3.50 $\pm$ 0.64 a   | 11.53 $\pm$ 0.92 a  |
| 180                | 77.19 $\pm$ 5.11 a  | 86.92 $\pm$ 5.64 a  | 86.92 $\pm$ 5.64 a  | 89.7a $\pm$ 6.95 a    | 6.23 $\pm$ 0.32 a | 0.13 $\pm$ 0.01 a          | 3.21 $\pm$ 0.56 a   | 10.45 $\pm$ 1.70 a  |
| 300                | 77.08 $\pm$ 3.99 a  | 81.25 $\pm$ 2.08 a  | 81.25 $\pm$ 2.08 a  | 94.72 $\pm$ 3.06 a    | 6.03 $\pm$ 0.23 a | 0.21 $\pm$ 0.01 c          | 4.85 $\pm$ 0.25 a   | 8.60 $\pm$ 0.15 a   |

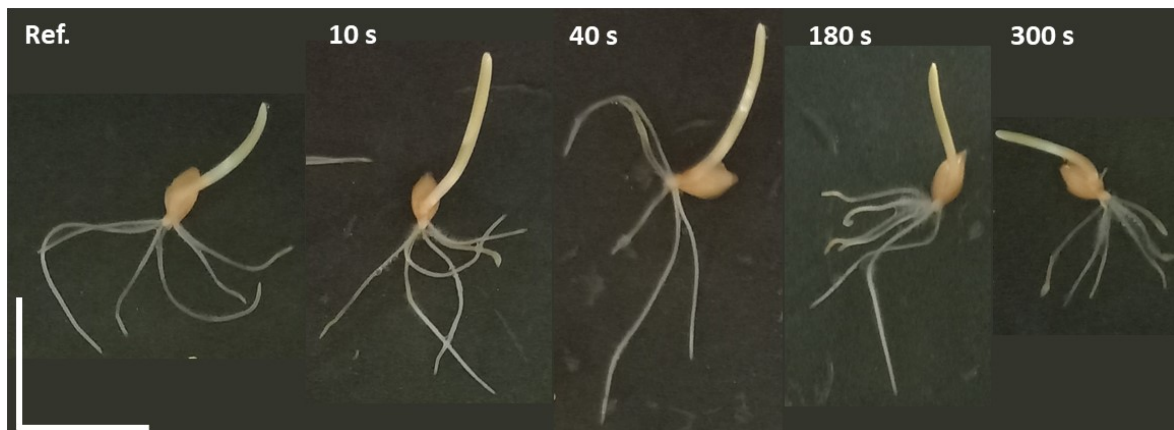

Figure S2: Barley kernels after three days of germination – comparison of root system length of untreated (ref.) and plasma-treated samples. White lines represent 1 cm.
